# Supplementary material for: Dissimilar Effects of Anagliptin and Sitagliptin on Lipoprotein Subclass in Standard or Strong Statin-Treated Patients with Type-2 Diabetes Mellitus: A Subanalysis of the REASON (Randomized Evaluation of Anagliptin versus Sitagliptin on Low-Density LipoproteiN Cholesterol in Diabetes) Trial
Source: MDPI journal article supplement (doi:10.3390/jcm9010093), 2019-12-30
Supplement: s1 [file s1]

**Supplement 2. Values of triglycerides in lipoprotein and lipoprotein subclass in patients treated either with anagliptin or sitagliptin at 0 and 52 week**

| 0 week  |                        |                       |      |            |                      |                      |                            |                |                     |                     |
|---------|------------------------|-----------------------|------|------------|----------------------|----------------------|----------------------------|----------------|---------------------|---------------------|
|         | Anagliptin             | Sitagliptin           | P    | 4 subclass | Anagliptin           | Sitagliptin          | Peak number of 20 subclass | Subclass name  | Anagliptin          | Sitagliptin         |
| TG      | 144.75 [108.5 , 187.7] | 123.49 [90.0 , 174.2] | 0.18 | CM         | 14.14 [6.8 , 25.8]   | 10.00 [3.7 , 19.8]   | P01                        | CM             | 8.30 [3.5 , 15.0]   | 5.62 [2.0 , 13.2]   |
|         |                        |                       |      |            |                      |                      | P02                        | CM             | 6.19 [3.0 , 10.0]   | 4.54 [1.7 , 7.7]    |
|         |                        |                       |      | VLDL       | 89.72 [61.3 , 123.1] | 76.35 [43.8 , 103.9] | P03                        | large VLDL     | 15.03 [8.5 , 20.5]  | 11.07 [4.9 , 18.6]  |
|         |                        |                       |      |            |                      |                      | P04                        | large VLDL     | 24.47 [13.3 , 34.1] | 17.78 [9.4 , 30.1]  |
|         |                        |                       |      |            |                      |                      | P05                        | large VLDL     | 28.79 [20.1 , 37.7] | 23.65 [15.1 , 31.6] |
|         |                        |                       |      |            |                      |                      | P06                        | medium VLDL    | 13.99 [11.3 , 17.8] | 11.34 [8.9 , 17.4]  |
|         |                        |                       |      |            |                      |                      | P07                        | small VLDL     | 6.40 [5.4 , 7.5]    | 6.19 [5.0 , 7.8]    |
|         |                        |                       |      | LDL        | 25.17 [21.8 , 29.1]  | 25.75 [21.9 , 32.1]  | P08                        | large LDL      | 9.89 [8.4 , 11.3]   | 10.24 [8.3 , 13.3]  |
|         |                        |                       |      |            |                      |                      | P09                        | medium LDL     | 9.48 [8.2 , 11.2]   | 10.32 [8.4 , 12.2]  |
|         |                        |                       |      |            |                      |                      | P10                        | small LDL      | 3.65 [3.1 , 4.5]    | 3.78 [3.0 , 4.9]    |
|         |                        |                       |      |            |                      |                      | P11                        | very small LDL | 1.27 [1.1 , 1.6]    | 1.24 [1.0 , 1.5]    |
|         |                        |                       |      |            |                      |                      | P12                        | very small LDL | 0.30 [0.2 , 0.5]    | 0.25 [0.1 , 0.4]    |
|         |                        |                       |      |            |                      |                      | P13                        | very small LDL | 0.37 [0.3 , 0.5]    | 0.30 [0.3 , 0.4]    |
|         |                        |                       |      |            |                      |                      | P14                        | very large HDL | 0.29 [0.2 , 0.4]    | 0.23 [0.2 , 0.4]    |
|         |                        |                       |      |            |                      |                      | P15                        | very large HDL | 0.75 [0.5 , 1.3]    | 0.78 [0.5 , 1.1]    |
|         |                        |                       |      | HDL        | 15.57 [12.2 , 20.7]  | 14.70 [11.6 , 18.7]  | P16                        | large HDL      | 3.46 [2.5 , 5.5]    | 3.73 [2.3 , 4.9]    |
|         |                        |                       |      |            |                      |                      | P17                        | medium HDL     | 5.38 [4.2 , 7.2]    | 5.20 [3.7 , 6.9]    |
|         |                        |                       |      |            |                      |                      | P18                        | small HDL      | 3.55 [2.9 , 4.7]    | 3.20 [2.3 , 4.5]    |
|         |                        |                       |      |            |                      |                      | P19                        | very small HDL | 0.80 [0.5 , 1.1]    | 0.62 [0.4 , 0.9]    |
|         |                        |                       |      |            |                      |                      | P20                        | very small HDL | 1.17 [1.0 , 1.4]    | 1.08 [1.0 , 1.3]    |
| 52 week |                        |                       |      |            |                      |                      |                            |                |                     |                     |
|         | Anagliptin             | Sitagliptin           | P    | 4 subclass | Anagliptin           | Sitagliptin          | Peak number of 20 subclass | Subclass name  | Anagliptin          | Sitagliptin         |
| TG      | 120.47 [96.1 , 146.7]  | 103.23 [82.6 , 150.9] | 0.56 | CM         | 13.72 [8.8 , 23.0]   | 10.33 [5.4 , 22.6]   | P01                        | CM             | 8.12 [4.8 , 15.8]   | 6.31 [3.0 , 14.3]   |
|         |                        |                       |      |            |                      |                      | P02                        | CM             | 5.20 [3.9 , 7.8]    | 4.00 [2.3 , 7.6]    |
|         |                        |                       |      | VLDL       | 66.20 [50.7 , 76.2]  | 51.72 [37.9 , 80.1]  | P03                        | large VLDL     | 11.17 [8.1 , 13.9]  | 8.51 [5.3 , 14.0]   |
|         |                        |                       |      |            |                      |                      | P04                        | large VLDL     | 16.15 [11.3 , 20.0] | 11.56 [8.0 , 19.9]  |
|         |                        |                       |      |            |                      |                      | P05                        | large VLDL     | 20.52 [15.3 , 23.6] | 16.04 [12.4 , 24.7] |
|         |                        |                       |      |            |                      |                      | P06                        | medium VLDL    | 11.24 [8.8 , 14.0]  | 9.77 [7.1 , 13.6]   |
|         |                        |                       |      |            |                      |                      | P07                        | small VLDL     | 5.32 [4.3 , 6.2]    | 5.08 [3.6 , 6.6]    |
|         |                        |                       |      | LDL        | 25.10 [21.0 , 28.4]  | 25.58 [22.3 , 30.5]  | P08                        | large LDL      | 9.23 [7.8 , 10.7]   | 9.44 [8.0 , 11.4]   |
|         |                        |                       |      |            |                      |                      | P09                        | medium LDL     | 9.50 [8.0 , 11.5]   | 9.89 [8.9 , 12.0]   |
|         |                        |                       |      |            |                      |                      | P10                        | small LDL      | 3.83 [3.1 , 5.0]    | 3.99 [3.2 , 4.9]    |
|         |                        |                       |      |            |                      |                      | P11                        | very small LDL | 1.20 [1.0 , 1.5]    | 1.21 [0.9 , 1.6]    |
|         |                        |                       |      |            |                      |                      | P12                        | very small LDL | 0.44 [0.3 , 0.6]    | 0.40 [0.3 , 0.7]    |
|         |                        |                       |      |            |                      |                      | P13                        | very small LDL | 0.35 [0.3 , 0.5]    | 0.34 [0.3 , 0.5]    |
|         |                        |                       |      |            |                      |                      | P14                        | very large HDL | 0.36 [0.3 , 0.5]    | 0.31 [0.2 , 0.5]    |
|         |                        |                       |      |            |                      |                      | P15                        | very large HDL | 0.78 [0.6 , 1.1]    | 0.86 [0.5 , 1.4]    |
|         |                        |                       |      | HDL        | 16.36 [14.0 , 21.3]  | 15.43 [12.2 , 19.8]  | P16                        | large HDL      | 3.73 [3.1 , 5.5]    | 4.01 [2.8 , 5.8]    |
|         |                        |                       |      |            |                      |                      | P17                        | medium HDL     | 5.59 [4.6 , 7.4]    | 5.28 [4.0 , 6.8]    |
|         |                        |                       |      |            |                      |                      | P18                        | small HDL      | 3.63 [3.0 , 4.2]    | 3.08 [2.4 , 4.1]    |
|         |                        |                       |      |            |                      |                      | P19                        | very small HDL | 0.71 [0.6 , 0.9]    | 0.65 [0.4 , 0.9]    |
|         |                        |                       |      |            |                      |                      | P20                        | very small HDL | 1.23 [1.1 , 1.4]    | 1.18 [1.0 , 1.4]    |

\*P < 0.05, \*\*P < 0.01 between at 0 and 52 week.

TC: total cholesterol, TG: triglycerides, CM: chylomicron, CM-C: CM cholesterol, VLDL: very low-density lipoprotein, VLDL-C: VLDL cholesterol, VLDL: low-density lipoprotein, LDL-C: LDL cholesterol, HDL: high-density lipoprotein, HDL-C: LDL cholesterol,
